# Supplementary material for: Structural Analysis of CsoS1A and the Protein Shell of the Halothiobacillus neapolitanus Carboxysome
Source: PLOS journal article supplement (doi:10.1371/journal.pbio.0050144), 2007-05-17
Supplement: S3 (10.1371/journal.pbio.0050144.s003) [file journal.pbio.0050144.s003]

| Table S3. Data collection and refinement statistics | | |
| --- | --- | --- |
| Ligand | None | SO4 |
| Metal | None | None |
| *Data collection statistics* | | |
| Resolution (Å) | 57.54 - 1.40 | 57.35 - 1.61 |
| Space group | P6 | P6 |
| Unit cell dimensions | | |
| a (Å) | 66.417 | 66.196 |
| b (Å) | 66.417 | 66.196 |
| c (Å) | 28.982 | 27.421 |
| Radiation source | ALS 8.2.2 | ALS 8.2.2 |
| Radiation wavelength (Å) | 1.0 | 1.0 |
| Measured reflections | 114978 | 130257 |
| Unique reflections | 13639 | 130257 |
| Overall completeness (%) | 93.8 | 99.8 |
| Overall completeness (I/>0) (%) | 84.9 | 99.03 |
| Last shell completeness (%) | 71.8 | 98.5 |
| Overall Rsyma | 0.073 | 0.101 |
| Last shell Rsym | 0.395 | 0.562 |
| Overall I/σ (I) | 24.8 | 23.1 |
| Last shell I/σ (I) | 2.42 | 4.88 |
| *Refinement statistics* | | |
| Rworkb | 0.185 | 0.218 |
| Rfreec | 0.24 | 0.26 |
| rmsd bond lengths (Å) | 0.017 | 0.012 |
| rmsd bond angles (degrees) | 1.691 | 1.613 |
| Overall B-factor | 28.56 | 15.95 |
| Solvent atoms | 52 | 31 |
| Average solvent B-factor | 42.53 | 24.97 |
| PDB ID code | 2EWH | 2G13 |

aRsym(I) = Σhkl( (Σi|Ihkl,i - <Ihkl>|) / ΣiIhkl,i)

bRwork = Σhkl |Fobs - Fcalc| / Σhkl Fobs

cRfree = Σhkl |Fobs - Fcalc| / Σhkl Fobs, where all reflections belong to a test set of 5% randomly selected data.
